# Supplementary material
Source: publisher site journal article supplement (https://www.spandidos-publications.com/6849/downloadSupplementary)
Supplement: Supplementary file 1 [file downloadSupplementary]

## Sheet: Sheet2
Table SVI. Common PSAT1-associated genes in EGFR-mutant NSCLC are listed with fold-change (Tumor/Normal), P- and FDR value in the indicated dataset.
A, shPSAT1-downregulated genes
Illumina platform		GSE32863			GSE75037
Symbol	Probe ID	Fold-change (T/N)	p-value	FDR	Fold-change (T/N)	p-value	FDR
ANKRD22	ILMN_2132599	3.04	< 1x10-07	< 1x10-07	10.55	< 1x10-07	< 1x10-07
	ILMN_1799848	2.56	< 1x10-07	< 1x10-07	8.34	< 1x10-07	< 1x10-07
CDCA7	ILMN_1737184	2.94	9.65e-05	0.000111	4.66	8.9e-06	1.14e-05
MCM2	ILMN_1681503	2.11	7e-07	1.05e-06	3.15	< 1x10-07	< 1x10-07
MMP15	ILMN_1718646	3.1	1e-07	1.88e-07	5.39	< 1x10-07	< 1x10-07
NETO2	ILMN_1760849	1.47	0.0139968	0.014	1.67	0.0396896	0.042
NSUN5	ILMN_1751958	2.16	< 1x10-07	< 1x10-07	2.55	< 1x10-07	< 1x10-07
	ILMN_2294878				4.64	< 1x10-07	< 1x10-07
	ILMN_2408400				1.82	2.33e-05	2.8e-05
PAICS	ILMN_2392546	2.04	< 1x10-07	< 1x10-07	2.17	< 1x10-07	< 1x10-07
	ILMN_1773760	2.03	< 1x10-07	1.88e-07	2.24	< 1x10-07	< 1x10-07
PSAT1	ILMN_1692938	2.48	2.3e-06	3.14e-06	6.75	< 1x10-07	< 1x10-07
SFN	ILMN_1806607	5.04	< 1x10-07	< 1x10-07	10.11	< 1x10-07	< 1x10-07
SLC39A4	ILMN_1706386	2.03	1.32e-05	1.65e-05	2.91	3e-07	4.15e-07
SPAG4	ILMN_1684620	1.82	< 1x10-07	< 1x10-07	5.11	< 1x10-07	< 1x10-07
TYMS	ILMN_1806040	1.51	0.0021442	0.0023	1.7	0.0074576	0.00839
UHRF1	ILMN_1786065	2.57	2e-07	3.33e-07	5.5	< 1x10-07	< 1x10-07
B, shPSAT1-upregulated genes
Illumina platform		GSE32863			GSE75037
ALOX5	ILMN_1680996	0.21	< 1x10-07	< 1x10-07	0.21	< 1x10-07	< 1x10-07
	ILMN_1792150				0.61	7.8e-06	1.64e-05
BTG2	ILMN_1770085	0.29	6e-07	1.8e-06	0.24	< 1x10-07	< 1x10-07
CFD	ILMN_1777190	0.11	< 1x10-07	< 1x10-07	0.1	< 1x10-07	< 1x10-07
EFNB2	ILMN_1703852	0.53	0.0019175	0.0024	0.5	0.0006436	0.000827
FILIP1L	ILMN_2391150	0.57	0.0035555	0.0041	0.5	0.0018747	0.00225
GPRC5A	ILMN_1682599	0.42	8.1e-06	1.74e-05	0.35	2.2e-06	5.66e-06
HBEGF	ILMN_2121408	0.29	1.1e-06	2.75e-06	0.22	< 1x10-07	3e-07
JAG1	ILMN_1691376	0.69	0.0078341	0.00839	0.64	0.0098901	0.0105
S100A9	ILMN_1750974	0.3	0.0004969	0.000745	0.25	3.49e-05	5.71e-05
SCEL	ILMN_2388190	0.65	0.0001429	0.000268	0.34	1.56e-05	2.81e-05
	ILMN_1710325	0.68	0.0003773	0.000629		8.69e-05	0.00013
SPTBN1	ILMN_1714228	0.28	< 1x10-07	< 1x10-07	0.059	< 1x10-07	< 1x10-07
	ILMN_1690708	0.34	< 1x10-07	< 1x10-07	0.15	< 1x10-07	< 1x10-07
	ILMN_1661335				0.72 a	0.0434066	0.0434
TJP2	ILMN_1763972				0.33	8.2e-06	1.64e-05
	ILMN_1664978	0.69	0.0012832	0.00175	0.6	0.0001855	0.000257
	ILMN_2384561				0.55	0.0044278	0.00498
a do not meet criteria
